# Supplementary material for: The Polysomnographical Meaning of Changed Sleep Quality—A Study of Treatment with Reduced Time in Bed
Source: MDPI journal article supplement (doi:10.3390/brainsci13101426), 2023-10-07
Supplement: s1 [file s1]

## Supplementary

**Table S1. Correlations between subjective and objective variables at baseline and at treatment week 1. First half of PSG variables**

|                         | TIB   | WA-SO | TST   | Sleep lat. | Sleep eff | #aw   |
|-------------------------|-------|-------|-------|------------|-----------|-------|
| <b>Baseline</b>         |       |       |       |            |           |       |
| <b>Diff asleep</b>      | .01   | -.02  | .16   | -.43*      | .23       | -.01  |
| <b>Sleep qual</b>       | -.24  | -.37* | .14   | -.14       | .38*      | -.13  |
| <b>Dist sleep</b>       | .16   | .23   | .02   | .16        | -.21      | .32   |
| <b>Early aw</b>         | -.25  | .23   | -.01  | -.09       | .10       | .10   |
| <b># aw</b>             | -.01  | .14   | .27   | -.22       | -.41*     | -.41* |
| <b>Enough sl</b>        | -.25  | .31   | .02   | -.14       | .31       | -.20  |
| <b>Well rested</b>      | .03   | .20   | .44*  | -.25       | .52**     | -.31  |
| <b>Ease aw</b>          | -.07  | .03   | -.34° | -.37*      | .47**     | -.24  |
| <b>SQindex</b>          | -.16  | -.12  | .11   | .21        | -.27      | .16   |
| <b>RSindex</b>          | -.10  | -.45* | .37*  | -.17       | -.02      | .15   |
| <b>ISI</b>              | -.09  | .10   | -.21  | .11        | -.14      | -.04  |
| <b>Treatment week 5</b> |       |       |       |            |           |       |
| <b>Diff asleep</b>      | -.02  | -.20  | .08   | -.11       | .21       | -.13  |
| <b>Sleep qual</b>       | -.01  | -.13  | .01   | .35°       | .04       | -.01  |
| <b>Dist sleep</b>       | -.13  | -.08  | -.12  | .30        | -.07      | .20   |
| <b>Early aw</b>         | .23   | -.11  | .17   | .25        | -.09      | .09   |
| <b># aw</b>             | .14   | -.29  | .14   | -.20       | .07       | -.40* |
| <b>Enough sl</b>        | .31   | -.30  | .29   | -.28       | .07       | -.15  |
| <b>Well rested</b>      | .20   | -.39* | .21   | .12        | .09       | -.09  |
| <b>Ease aw</b>          | .03   | -.37* | .10   | .09        | .22       | -.24  |
| <b>SQindex</b>          | -.21  | -.24  | -.27  | .22        | .04       | -.03  |
| <b>RSindex</b>          | -.36* | -.09  | -.06  | .12        | .02       | -.17  |
| <b>ISIndex</b>          | -.09  | -.35* | -.01  | -.26       | .36*      | .20   |

\*=p<.05, \*\*=p<.01. SQ = Sleep quality index. RS = Restorative sleep index. ISI = Insomnia Severity Scale.  
# aw = number of awakenings. sl=sleep.

**Table S2. Correlations between subjective and objective variables at baseline and at treatment week B) Second half of PSG variables**

|                         | REM<br>% | N1<br>% | N2<br>% | N3<br>% | REM<br>min | N1<br>min | N2<br>min | N3<br>min |
|-------------------------|----------|---------|---------|---------|------------|-----------|-----------|-----------|
| <b>Baseline</b>         |          |         |         |         |            |           |           |           |
| <b>Diff asleep</b>      | -.26     | -.10    | .12     | .19     | -.10       | -.03      | .22       | .17       |
| <b>Sleep qual</b>       | -.05     | -.06    | .03     | .05     | .07        | -.09      | .17       | .10       |
| <b>Dist sleep</b>       | -.28     | .10     | -.05    | .17     | -.15       | .10       | -.03      | .09       |
| <b>Early aw</b>         | -.01     | .15     | -.18    | .06     | .03        | .08       | -.08      | .09       |
| <b># aw</b>             | .27      | -.26    | .20     | -.17    | .31        | -.17      | .33       | -.13      |
| <b>Enough sl</b>        | -.39*    | -.09    | -.03    | -.18    | .28        | -.10      | .06       | -.05      |
| <b>Well rested</b>      | -.37*    | -.30    | .23     | -.25    | .45*       | -.16      | .48**     | -.17      |
| <b>Ease aw</b>          | .34      | -.28    | .10     | -.07    | .40*       | -.15      | .31       | -.03      |
| <b>SQindex</b>          | -.22     | .05     | -.05    | .20     | -.05       | .04       | .10       | .14       |
| <b>RSindex</b>          | -.46**   | -.30    | .15     | -.22    | .48**      | -.18      | .39*      | .12       |
| <b>ISI</b>              | -.25     | .03     | .02     | .17     | -.31       | -.03      | -.14      | .06       |
| <b>Treatment week 5</b> |          |         |         |         |            |           |           |           |
| <b>Diff asleep</b>      | .16      | -.16    | -.04    | .18     | .16        | -.08      | -.05      | .20       |
| <b>Sleep qual</b>       | -.13     | .00     | .00     | .09     | .00        | .02       | -.03      | .11       |
| <b>Dist sleep</b>       | -.01     | .11     | -.04    | -.11    | -.05       | .06       | -.13      | -.08      |
| <b>Early aw</b>         | -.38*    | .31     | .04     | -.24    | -.19       | .35*      | .12       | -.12      |
| <b># aw</b>             | -.25     | -.26    | .32     | .12     | -.12       | .21       | .36*      | .10       |
| <b>Enough sl</b>        | .00      | -.03    | .08     | -.16    | .12        | .13       | .24       | -.06      |
| <b>Well rested</b>      | -.14     | -.21    | .17     | .04     | .20        | -.14      | .26       | -.03      |
| <b>Ease aw</b>          | .20      | -.30    | .06     | .22     | .18        | -.24      | .01       | .20       |
| <b>SQindex</b>          | -.18     | .13     | -.10    | -.10    | -.08       | .04       | -.25      | .22       |
| <b>RSindex</b>          | .08      | -.13    | .13     | -.14    | .21        | -.08      | .03       | -.16      |
| <b>ISIindex</b>         | .18      | .28     | -.36*   | .04     | .03        | .03       | .18       | .07       |

\*=p<.05, \*\*=p<.01. SQ = Sleep quality index. RS = Restorative sleep index. ISI = Insomnia Severity Scale. # aw = number of awakenings. sl=sleep.
